# Supplementary material for: Glycated hemoglobin independently or in combination with fasting plasma glucose versus oral glucose tolerance test to detect abnormal glycometabolism in acute ischemic stroke: a Chinese cross-sectional study
Source: BMC Neurol. 2014 Sep 12;14:177. doi: 10.1186/s12883-014-0177-0 (PMC4172972; doi:10.1186/s12883-014-0177-0)
Supplement: Additional file 1: — Clinical characteristic of the three glycometabolism statues according to OGTT results. This table describes the clinical characteristics among the three abnormal glycometabolic profiles diagnosed by OGTT. The mean age, FPG, HbA1c, white cell counts, insulin resistance index, and low-density lipoprotein were all higher in the DM group (P < 0.05 in comparison among the three groups). The differences of other variables among the groups were not statistically significant. The variables were compared through one-way analysis of variance, test χ2 or Fisher’s exact test. A two-tailed P <0.05 was considered statistically significant. [file 12883_2014_177_MOESM1_ESM.xlsx]

## Sheet: Sheet1
Additional file 1	Clinical characteristic of the three glycometabolism statues according to OGTT results
Baseline characteristic	Total (n=1316)	Diabetes mellitus (n=356)	Prediabetes (n=425)	Normoglycemia (n=535)	P
Age (y)	62.4±12.6	64.7±12.3	64.0±12.4	59.6±12.4	0.037
Male (%)	63.3	53.4	65.6	68	<0.001
Current smoking (%)	33	31.2	31.5	35.3	0.388
Moderate to severe drinking (%)	15.5	12.9	14.8	17.8	0.081
Waist circumference (cm)	85.6±9.5	87.0±9.5	86.3±9.8	84.1±9.1	0.067
Body mass index (kg/m2)	24.6±3.7	25.2±3.8	24.6±3.7	24.3±3.5	0.436
Systolic blood pressure (mmHg)	146.4±22.1	148.7±22.3	144.6±21.6	146.2±22.3	0.257
Diastolic blood pressure (mmHg)	86.0±12.9	85.9±13.5	85.0±12.2	86.7±13.0	0.538
Past medical history (%)
Hypertension	58.6	61.5	60.5	55.1	0.228
Family history of stroke	10.2	9.8	10.4	10.3	0.901
Dyslipidemia	10.8	9.8	12.7	9.9	0.401
Coronary heart disease	11.2	9.8	12.5	11.2	0.458
Myocardial infarction	2.1	1.4	3.1	1.9	0.611
Fasting plasma glucose (mmol/L) time	5.7±1.8	7.0±2.5	5.4±1.1	5.1±0.9	<0.001
Glycated hemoglobin (%)	6.0±1.3	6.9±1.7	5.9±0.9	5.5±0.9	<0.001
Insulin resistance index a	1.1±0.8	1.5±0.9	1.3±0.8	1.1±1.0	0.022
Hemoglobin(g/L)	138.3±17.2	138.3±16.6	138.1±17.1	138.6±17.7	0.506
Serum uric acid (μmol/L)	311.0±99.9	310.0±99.6	314.7±99.1	308.6±100.8	0.996
Cholesterol(mmol/L)	4.8±1.1	4.9±1.1	4.8±1.1	4.7±1.0	0.055
Low density lipoprotein (mmol/L)	3.1±1.4	3.2±1.5	3.1±1.3	3.0±1.3	0.031
High density lipoprotein (mmol/L)	1.2±0.4	1.1±0.3	1.2±0.4	1.2±0.3	0.259
Triglyceride (mmol/L)	1.7±1.0	1.9±1.1	1.7±1.0	1.6±1.0	0.246
Serum creatinine (μmol/L)	482.0±76.1	75.4±25.3	78.0±29.0	75.1±25.0	0.665
a expressed as homeostasis model assessment of insulin resistance (HOMA-IR).
